# Supplementary figures and images for: Distribution and health-risk of polycyclic aromatic hydrocarbons in soils at a coking plant
Source: Royal Society of Chemistry journal article supplement (doi:10.1039/c1em10671f), 2011-01-01

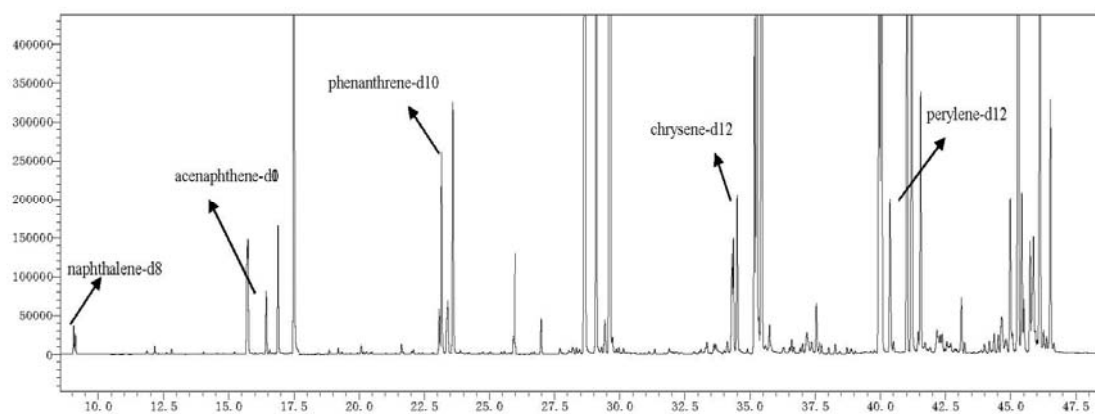

Fig S1. The gas chromatogram of one soil sample.

Supplement: c1em10671f.pdf [file c1em10671f.pdf]
